# Supplementary material for: Conformational equilibria and interaction preference in the complex of isoprene–maleic anhydride
Source: Royal Society of Chemistry journal article supplement (doi:10.1039/d3cp03712f), 2023-01-01
Supplement: d3cp03712f1.pdf [file d3cp03712f1.pdf]

## Electronic Supplementary Information

### **Conformational equilibria and interaction preference in complex of isoprene-maleic anhydride**

Tianyue Gao, Juncheng Lei, Siyu Zou, Chenxu Wang, Xuefang Xu,\* and Qian Gou\*

## **Contents:**

**Table S1.** The measured transition frequencies of isomer I with quantum numbers and difference to calculated frequencies  $\Delta\nu$  in the least squares fit.

**Table S2.** The measured transition frequencies of isomer II with quantum numbers and difference to calculated frequencies  $\Delta\nu$  in the least squares fit.

**Table S3.** Comparison of theoretical (with different methods) and experimental spectroscopic constants of isomers I and II.

**Table S4.** CP-B2PLYP-D3(BJ)/def2-TZVP calculated geometries of isomer I.

**Table S5.** CP-B2PLYP-D3(BJ)/def2-TZVP calculated geometries of isomer II.

**Table S6.** Intensities (in arbitrary units) of isomers I and II for several selected  $\mu_c$ -type transitions.

**Table S7.** SAPT analysis (all values in  $\text{kJ mol}^{-1}$ ).

**Table S8.** Stabilization energy contributions ( $E^{(2)} \geq 0.40 \text{ kJ mol}^{-1}$ ) for isomers I and II of ISO-MA.

**Table S1.** The measured transition frequencies of isomer I with quantum numbers and difference to calculated frequencies  $\Delta\nu$  in the least squares fit.

| Transitions    |                   | $\nu/\text{MHz}$ | $\Delta\nu/\text{MHz}$ |
|----------------|-------------------|------------------|------------------------|
| $J' K_a' K_c'$ | $J'' K_a'' K_c''$ |                  |                        |
| 5 0 5          | 4 0 4             | 6755.3681        | 0.0009                 |
| 5 1 5          | 4 1 4             | 6732.2758        | 0.0006                 |
| 5 1 4          | 4 1 3             | 7451.2625        | 0.0006                 |
| 6 0 6          | 5 0 5             | 8034.1955        | 0.0001                 |
| 6 1 6          | 5 1 5             | 8025.8731        | 0.0008                 |
| 6 1 5          | 5 1 4             | 8723.1197        | -0.0003                |
| 7 0 7          | 6 0 6             | 9317.8273        | -0.0087                |
| 7 1 7          | 6 1 6             | 9315.0775        | 0.0027                 |
| 7 1 6          | 6 1 5             | 9975.5716        | 0.0010                 |
| 8 0 8          | 7 0 7             | 10603.4651       | 0.0004                 |
| 8 1 8          | 7 1 7             | 10602.5959       | -0.0001                |
| 8 1 7          | 7 1 6             | 11239.1927       | 0.0001                 |
| 9 0 9          | 8 0 8             | 11889.7999       | 0.0002                 |
| 9 1 9          | 8 1 8             | 11889.5376       | 0.0012                 |
| 3 1 2          | 2 0 2             | 5408.2937        | -0.0009                |
| 3 2 2          | 2 1 2             | 5939.2868        | -0.0003                |
| 3 2 1          | 2 1 1             | 5651.0802        | 0.0008                 |
| 3 3 1          | 2 2 1             | 6518.0685        | 0.0029                 |
| 3 3 0          | 2 2 0             | 6470.2680        | 0.0001                 |
| 4 1 3          | 3 0 3             | 7300.4731        | -0.0020                |
| 4 2 3          | 3 1 3             | 7677.8386        | 0.0003                 |
| 4 2 2          | 3 1 2             | 7250.6856        | 0.0002                 |
| 4 3 2          | 3 2 2             | 8084.0694        | -0.0027                |
| 4 3 1          | 3 2 1             | 7898.8744        | -0.0005                |
| 4 4 1          | 3 3 1             | 8798.7030        | 0.0006                 |
| 4 4 0          | 3 3 0             | 8787.7491        | -0.0080                |
| 5 1 4          | 4 0 4             | 9267.4349        | -0.0014                |
| 5 2 4          | 4 1 4             | 9482.8022        | 0.0005                 |
| 5 2 3          | 4 1 3             | 8976.9898        | 0.0018                 |
| 5 3 3          | 4 2 3             | 9715.5997        | 0.0021                 |
| 5 3 2          | 4 2 2             | 9336.7563        | 0.0008                 |
| 5 4 2          | 4 3 2             | 10314.4195       | 0.0000                 |
| 5 4 1          | 4 3 1             | 10248.0424       | 0.0002                 |
| 5 5 1          | 4 4 1             | 11093.5960       | 0.0003                 |
| 5 5 0          | 4 4 0             | 11091.5913       | 0.0003                 |
| 6 1 5          | 5 0 5             | 11235.1887       | -0.0005                |
| 6 2 5          | 5 1 5             | 11335.7617       | -0.0005                |
| 6 2 4          | 5 1 4             | 10844.8427       | 0.0007                 |

---

|       |       |            |         |
|-------|-------|------------|---------|
| 6 3 4 | 5 2 4 | 11420.3041 | 0.0010  |
| 6 3 3 | 5 2 3 | 10866.1333 | 0.0006  |
| 6 4 3 | 5 3 3 | 11864.8197 | 0.0014  |
| 6 4 2 | 5 3 2 | 11657.7924 | -0.0007 |
| 6 5 2 | 5 4 2 | 12591.6875 | -0.0002 |
| 6 5 1 | 5 4 1 | 12575.2407 | -0.0008 |
| 6 6 1 | 5 5 1 | 13391.7681 | -0.0010 |
| 6 6 0 | 5 5 0 | 13391.4428 | 0.0013  |
| 7 1 6 | 6 0 6 | 13176.5649 | 0.0004  |
| 7 2 6 | 6 1 6 | 13217.3583 | -0.0011 |
| 7 2 5 | 6 1 5 | 12822.5691 | 0.0006  |
| 7 3 5 | 6 2 5 | 13195.1120 | 0.0030  |
| 7 3 4 | 6 2 4 | 12534.5243 | -0.0008 |
| 7 4 4 | 6 3 4 | 13469.8126 | 0.0009  |
| 7 4 3 | 6 3 3 | 13046.7801 | 0.0005  |
| 7 5 3 | 6 4 3 | 14100.0007 | 0.0004  |
| 7 5 2 | 6 4 2 | 14028.9154 | 0.0024  |
| 7 6 2 | 6 5 2 | 14885.7182 | -0.0001 |
| 7 6 1 | 6 5 1 | 14882.3566 | 0.0002  |
| 7 7 1 | 6 6 1 | 15690.4400 | 0.0012  |
| 7 7 0 | 6 6 0 | 15690.3900 | 0.0012  |
| 8 1 7 | 7 0 7 | 15097.9283 | 0.0072  |
| 8 2 7 | 7 1 7 | 15113.0129 | -0.0084 |
| 8 2 6 | 7 1 6 | 14828.7100 | -0.0019 |
| 8 3 6 | 7 2 6 | 15027.0452 | 0.0000  |
| 8 3 5 | 7 2 5 | 14361.7584 | 0.0000  |
| 8 4 5 | 7 3 5 | 15143.3214 | -0.0001 |
| 8 4 4 | 7 3 4 | 14502.9516 | -0.0003 |
| 8 5 4 | 7 4 4 | 15634.0467 | 0.0000  |
| 8 5 3 | 7 4 3 | 15427.7612 | -0.0007 |
| 8 6 3 | 7 5 3 | 16379.6373 | -0.0021 |
| 8 6 2 | 7 5 2 | 16361.3794 | 0.0005  |
| 8 7 2 | 7 6 2 | 17183.8333 | -0.0018 |
| 8 7 1 | 7 6 1 | 17183.2206 | -0.0005 |
| 8 8 1 | 7 7 1 | 17989.0605 | -0.0023 |
| 8 8 0 | 7 7 0 | 17989.0605 | 0.0049  |
| 9 2 7 | 8 1 7 | 16807.5098 | 0.0026  |
| 9 3 7 | 8 2 7 | 16897.8777 | -0.0009 |
| 9 3 6 | 8 2 6 | 16331.5183 | -0.0019 |
| 9 4 6 | 8 3 6 | 16888.7892 | 0.0018  |
| 9 4 5 | 8 3 5 | 16099.8564 | -0.0007 |
| 9 5 5 | 8 4 5 | 17213.9219 | 0.0014  |
| 9 5 4 | 8 4 4 | 16781.8471 | 0.0010  |

---

---

|       |       |            |         |
|-------|-------|------------|---------|
| 9 6 4 | 8 5 4 | 17879.2215 | 0.0003  |
| 9 6 3 | 8 5 3 | 17810.7984 | -0.0008 |
| 9 7 3 | 8 6 3 | 18674.8140 | -0.0009 |
| 9 7 2 | 8 6 2 | 18670.8342 | -0.0012 |

---

**Table S2.** The measured transition frequencies of isomer II with quantum numbers and difference to calculated frequencies  $\Delta\nu$  in the least squares fit.

| Transitions    |                   | $\nu/\text{MHz}$ | $\Delta\nu/\text{MHz}$ |
|----------------|-------------------|------------------|------------------------|
| $J' K_a' K_c'$ | $J'' K_a'' K_c''$ |                  |                        |
| 4 0 4          | 3 0 3             | 5139.8940        | -0.0027                |
| 4 1 4          | 3 1 3             | 5035.4844        | -0.0033                |
| 4 1 3          | 3 1 2             | 5575.2082        | 0.0002                 |
| 4 2 3          | 3 2 2             | 5337.8483        | 0.0002                 |
| 4 2 2          | 3 2 1             | 5555.7719        | -0.0004                |
| 4 3 2          | 3 3 1             | 5401.9456        | -0.0007                |
| 4 3 1          | 3 3 0             | 5419.8782        | 0.0004                 |
| 5 0 5          | 4 0 4             | 6331.7258        | 0.0016                 |
| 5 1 5          | 4 1 4             | 6262.8832        | 0.0001                 |
| 5 1 4          | 4 1 3             | 6900.3388        | -0.0001                |
| 5 2 4          | 4 2 3             | 6640.3046        | -0.0013                |
| 5 2 3          | 4 2 2             | 7003.7954        | 0.0008                 |
| 5 3 3          | 4 3 2             | 6759.1725        | 0.0009                 |
| 5 4 2          | 4 4 1             | 6754.8867        | 0.0011                 |
| 5 4 1          | 4 4 0             | 6757.2432        | -0.0015                |
| 6 0 6          | 5 0 5             | 7518.0504        | -0.0002                |
| 6 1 6          | 5 1 5             | 7479.4362        | -0.0001                |
| 6 1 5          | 5 1 4             | 8171.9560        | -0.0009                |
| 6 2 5          | 5 2 4             | 7923.3722        | -0.0001                |
| 6 2 4          | 5 2 3             | 8431.9690        | 0.0010                 |
| 6 3 3          | 5 3 2             | 8254.4004        | 0.0000                 |
| 6 3 4          | 5 3 3             | 8110.8022        | -0.0009                |
| 6 4 3          | 5 4 2             | 8121.7624        | -0.0003                |
| 6 4 2          | 5 4 1             | 8132.0870        | 0.0014                 |
| 7 0 7          | 6 0 6             | 8708.0365        | -0.0004                |
| 7 1 7          | 6 1 6             | 8688.5123        | -0.0013                |
| 7 1 6          | 6 1 5             | 9389.4682        | -0.0011                |
| 7 2 6          | 6 2 5             | 9186.1961        | -0.0019                |
| 7 2 5          | 6 2 4             | 9821.6521        | -0.0015                |
| 7 3 5          | 6 3 4             | 9450.3910        | -0.0028                |
| 7 3 4          | 6 3 3             | 9723.7274        | -0.0013                |
| 7 4 4          | 6 4 3             | 9493.0030        | 0.0020                 |
| 7 4 3          | 6 4 2             | 9525.7907        | 0.0006                 |
| 7 5 3          | 6 5 2             | 9469.1375        | 0.0056                 |
| 7 5 2          | 6 5 1             | 9470.5453        | 0.0032                 |
| 8 0 8          | 7 0 7             | 9902.2907        | -0.0013                |
| 8 1 8          | 7 1 7             | 9893.0566        | 0.0031                 |
| 8 1 7          | 7 1 6             | 10571.8297       | 0.0000                 |

---

|         |         |            |         |
|---------|---------|------------|---------|
| 8 2 7   | 7 2 6   | 10430.0849 | -0.0005 |
| 8 2 6   | 7 2 5   | 11159.9243 | -0.0015 |
| 8 3 6   | 7 3 5   | 10772.3754 | -0.0005 |
| 8 3 5   | 7 3 4   | 11203.1132 | 0.0006  |
| 8 4 5   | 7 4 4   | 10864.6286 | -0.0025 |
| 8 4 4   | 7 4 3   | 10947.9023 | -0.0007 |
| 8 5 4   | 7 5 3   | 10842.3154 | 0.0004  |
| 8 5 3   | 7 5 2   | 10847.7906 | 0.0024  |
| 9 0 9   | 8 0 8   | 11099.2891 | 0.0028  |
| 9 1 9   | 8 1 8   | 11095.1038 | -0.0007 |
| 9 1 8   | 8 1 7   | 11744.4794 | 0.0004  |
| 9 2 8   | 8 2 7   | 11658.1903 | 0.0017  |
| 9 2 7   | 8 2 6   | 12436.8436 | -0.0008 |
| 10 0 10 | 9 0 9   | 12297.7205 | -0.0004 |
| 10 1 10 | 9 1 9   | 12295.8845 | -0.0028 |
| 10 1 9  | 9 1 8   | 12922.1088 | 0.0005  |
| 10 2 9  | 9 2 8   | 12874.5880 | 0.0000  |
| 10 2 8  | 9 2 7   | 13652.8064 | 0.0007  |
| 11 0 11 | 10 0 10 | 13496.8328 | -0.0021 |
| 11 1 11 | 10 1 10 | 13496.0517 | 0.0018  |
| 11 1 10 | 10 1 9  | 14107.6317 | 0.0001  |
| 3 1 2   | 2 0 2   | 5002.0230  | 0.0001  |
| 3 2 2   | 2 1 2   | 5899.4546  | 0.0012  |
| 3 2 1   | 2 1 1   | 5605.1029  | 0.0006  |
| 3 3 1   | 2 2 1   | 6819.6586  | -0.0018 |
| 3 3 0   | 2 2 0   | 6796.8568  | -0.0019 |
| 4 1 3   | 3 0 3   | 6656.6616  | 0.0009  |
| 4 2 3   | 3 1 3   | 7442.7041  | 0.0015  |
| 4 2 2   | 3 1 2   | 6951.0832  | 0.0025  |
| 4 3 2   | 3 2 2   | 8202.9735  | -0.0005 |
| 4 3 1   | 3 2 1   | 8100.0468  | -0.0000 |
| 4 4 1   | 3 3 1   | 9264.0556  | -0.0020 |
| 4 4 0   | 3 3 0   | 9261.2965  | 0.0003  |
| 5 1 4   | 4 0 4   | 8417.1044  | 0.0015  |
| 5 2 4   | 4 1 4   | 9047.5219  | 0.0011  |
| 5 2 3   | 4 1 3   | 8379.6670  | -0.0002 |
| 5 3 3   | 4 2 3   | 9624.2989  | 0.0013  |
| 5 3 2   | 4 2 2   | 9362.9918  | 0.0003  |
| 5 4 2   | 4 3 2   | 10616.9965 | -0.0004 |
| 5 4 1   | 4 3 1   | 10598.6644 | 0.0013  |
| 5 5 1   | 4 4 1   | 11716.8477 | -0.0021 |
| 5 5 0   | 4 4 0   | 11716.5730 | -0.0038 |
| 6 1 5   | 5 0 5   | 10257.3325 | -0.0030 |

---

---

|       |       |            |         |
|-------|-------|------------|---------|
| 6 2 5 | 5 1 5 | 10708.0112 | 0.0011  |
| 6 2 4 | 5 1 4 | 9911.2952  | -0.0011 |
| 6 3 4 | 5 2 4 | 11094.7940 | -0.0007 |
| 6 3 3 | 5 2 3 | 10613.5974 | 0.0002  |
| 6 4 3 | 5 3 3 | 11979.5877 | -0.0004 |
| 6 4 2 | 5 3 2 | 11912.0332 | 0.0014  |
| 6 5 2 | 5 4 2 | 13064.5484 | -0.0001 |
| 6 5 1 | 5 4 1 | 13062.1780 | 0.0002  |
| 6 6 0 | 5 5 0 | 14170.5427 | 0.0079  |
| 7 1 6 | 6 0 6 | 12128.7558 | 0.0015  |
| 7 2 6 | 6 1 6 | 12414.7679 | -0.0037 |
| 7 2 5 | 6 1 5 | 11560.9911 | -0.0019 |
| 7 3 5 | 6 2 5 | 12621.8180 | 0.0016  |
| 7 3 4 | 6 2 4 | 11905.3570 | -0.0009 |
| 7 4 4 | 6 3 4 | 13361.7877 | 0.0018  |
| 7 4 3 | 6 3 3 | 13183.4244 | 0.0028  |
| 7 5 3 | 6 4 3 | 14411.9171 | -0.0006 |
| 7 5 2 | 6 4 2 | 14400.6317 | -0.0025 |
| 7 6 2 | 6 5 2 | 15517.8841 | -0.0004 |
| 7 6 1 | 6 5 1 | 15517.6250 | 0.0000  |
| 7 7 0 | 6 6 0 | 16624.2322 | -0.0021 |

---



**Table S3.** Comparison of theoretical (with different methods) and experimental spectroscopic constants of isomers I and II.

|                            | Isomers | A [MHz]                     | B [MHz]      | C [MHz]       |
|----------------------------|---------|-----------------------------|--------------|---------------|
| <b>Exp.</b>                | I       | 1149.541060                 | 830.244541   | 643.462812    |
|                            | II      | 1227.008821                 | 739.493310   | 600.064693    |
| CP-B2PLYP-D3(BJ)/def2-TZVP | I       | 1144.1 (-0.5%) <sup>a</sup> | 838.8(1.0%)  | 646.3 (0.4%)  |
|                            | II      | 1217.4 (-0.8%)              | 752.8(1.8%)  | 604.4 (0.7%)  |
| B2PLYP-D3(BJ)/def2-TZVP    | I       | 1144.2 (-0.5%)              | 855.3 (3.0%) | 656.2 (2.0%)  |
|                            | II      | 1217.4 (-0.8%)              | 766.8 (3.7%) | 612.71 (2.1%) |
| CP-B3LYP-D3(BJ)/def2-TZVP  | I       | 1143.8 (-0.5%)              | 851.3 (2.5%) | 652.9 (1.5%)  |
|                            | II      | 1214.0 (-1.3%)              | 768.1 (3.9%) | 611.3 (1.9%)  |
| B3LYP-D3(BJ)/def2-TZVP     | I       | 1143.2 (-0.6%)              | 857.3 (3.3%) | 656.2 (2.0%)  |
|                            | II      | 1213.9 (-1.1%)              | 773.6 (4.6%) | 614.6 (2.4%)  |
| CP-MP2/def2-TZVP           | I       | 1152.1 (0.2%)               | 857.7 (3.3%) | 656.2 (2.0%)  |
|                            | II      | 1225.2 (0.1%)               | 771.3 (4.3%) | 616.6 (2.8%)  |
| MP2/def2-TZVP              | I       | 1158.3 (3.1%)               | 890.6 (9.1%) | 682.6 (9.4%)  |
|                            | II      | 1227.9 (0.1%)               | 802.3 (8.5%) | 636.2 (6.0%)  |

<sup>a</sup> The error with respect to experiment is indicated as percentage between parentheses.

**Table S4.** CP-B2PLYP-D3(BJ)/def2-TZVP calculated geometries of isomer I.

| Bond lengths (Å) |       | Valence angles (°) |       | Dihedral angles (°) |        |
|------------------|-------|--------------------|-------|---------------------|--------|
| O2O1             | 2.267 |                    |       |                     |        |
| O3O2             | 2.266 | O3O2O1             | 161.2 |                     |        |
| C4O3             | 1.192 | C4O3O2             | 31.3  | C4O3O2O1            | -5.5   |
| C5O1             | 1.192 | C5O1O2             | 31.2  | C5O1O2C4            | 2.3    |
| C6C4             | 1.484 | C6C4O3             | 130.1 | C6C4O3O2            | 179.4  |
| C7C6             | 1.331 | C7C6C4             | 108.2 | C7C6C4O3            | -178.8 |
| H8C7             | 1.077 | H8C7C6             | 129.7 | H8C7C6C4            | -179.9 |
| H9C6             | 1.077 | H9C6C4             | 122.0 | H9C6C4O3            | 1.3    |
| C10C5            | 3.413 | C10C5C7            | 92.6  | C10C5C7C6           | -96.3  |
| C11C7            | 3.468 | C11C7C6            | 90.3  | C11C7C6C4           | -79.4  |
| C12C11           | 1.462 | C12C11C10          | 125.5 | C12C11C10C5         | 82.3   |
| C13C12           | 1.502 | C13C12C11          | 118.9 | O13C12C11C10        | 4.3    |
| C14C12           | 1.341 | C14C12C11          | 119.4 | C14C13C11C10        | -175.3 |
| H15C10           | 1.081 | H15C10C11          | 121.1 | H15C10C11C12        | 179.1  |
| H16C10           | 1.081 | H16C10C11          | 122.1 | H16C10C11C12        | -0.4   |
| H17C11           | 1.086 | H17C11C12          | 115.6 | H17C11C12C14        | 3.9    |
| H18C13           | 1.091 | H18C13C12          | 111.4 | H18C13C12C14        | 121.6  |
| H19C13           | 1.092 | H19C13C12          | 110.6 | H19C13C12C14        | -119.2 |
| H20C13           | 1.088 | H20C13C12          | 110.8 | H20C13C12C14        | 1.3    |
| H21C14           | 1.083 | H21C14C12          | 121.1 | H21C14C12C11        | -1.3   |
| H22C14           | 1.081 | H22C14C12          | 121.6 | H22C14C12C11        | 179.1  |

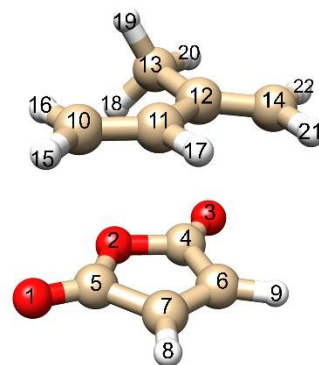

**Table S5.** CP-B2PLYP-D3(BJ)/def2-TZVP calculated geometries of isomer II.

| Bond lengths (Å) |       | Valence angles (°) |       | Dihedral angles (°) |        |
|------------------|-------|--------------------|-------|---------------------|--------|
| O2O1             | 2.265 |                    |       |                     |        |
| O3O2             | 2.267 | O3O2O1             | 161.2 |                     |        |
| C4O3             | 1.193 | C4O3O2             | 31.2  | C4O3O2O1            | 1.0    |
| C5O1             | 1.193 | C5O1O2             | 31.2  | C5O1O2C4            | -0.9   |
| C6C4             | 1.484 | C6C4O3             | 130.0 | C6C4O3O2            | 179.2  |
| C7C5             | 1.485 | C7C5O1             | 130.0 | C7C5O1O2            | -180.0 |
| H8C6             | 1.078 | H8C6C7             | 129.7 | H8C6C7C5            | 179.8  |
| H9C7             | 1.077 | H9C7C5             | 122.1 | H9C7C5O1            | -0.03  |
| C10H9            | 3.365 | C10H9C7            | 89.4  | C10H9C7C5           | -68.0  |
| C11C7            | 3.381 | C11C7C6            | 96.6  | C11C7C6C4           | -89.6  |
| C12C11           | 1.501 | C12C11C10          | 121.6 | C12C11C10H9         | -83.7  |
| C13C11           | 1.461 | C13C11C10          | 119.7 | O13C12C10H9         | 95.5   |
| C14C13           | 1.337 | C14C13C11          | 125.4 | C14C13C11C10        | -176.8 |
| H15C10           | 1.082 | H15C10C11          | 121.3 | H15C10C11C13        | -0.2   |
| H16C10           | 1.082 | H16C10C11          | 121.5 | H16C10C11C13        | 179.9  |
| H17C13           | 1.085 | H17C13C11          | 115.7 | H17C13C11C10        | 2.2    |
| H18C12           | 1.088 | H18C12C11          | 111.0 | H18C12C11C10        | -1.0   |
| H19C12           | 1.092 | H19C12C11          | 111.0 | H19C12C11C10        | -121.6 |
| H20C12           | 1.093 | H20C12C11          | 111.0 | H20C12C11C10        | 119.6  |
| H21C14           | 1.081 | H21C14C13          | 121.0 | H21C14C13C11        | 178.8  |
| H22C14           | 1.082 | H22C14C13          | 122.2 | H22C14C13C11        | -1.1   |

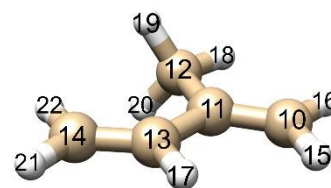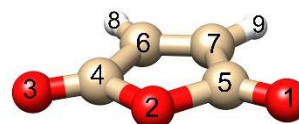

**Table S6.** Intensities (in arbitrary units) of isomers I and II for several selected  $\mu_c$ -type transitions.

| Transitions                | Isomers | Frequencies | Intensities |
|----------------------------|---------|-------------|-------------|
| $3_{30} \leftarrow 2_{20}$ | I       | 6470.2680   | 0.0093      |
|                            | II      | 6796.8591   | 0.0036      |
| $4_{31} \leftarrow 3_{21}$ | I       | 7898.8750   | 0.0107      |
|                            | II      | 8100.0479   | 0.004       |
| $5_{32} \leftarrow 4_{23}$ | I       | 9336.7572   | 0.0225      |
|                            | II      | 9362.9912   | 0.0067      |
| $5_{33} \leftarrow 4_{23}$ | I       | 9715.5975   | 0.0227      |
|                            | II      | 9624.2973   | 0.0083      |
| $5_{41} \leftarrow 4_{31}$ | I       | 10248.0416  | 0.0107      |
|                            | II      | 10598.6617  | 0.0033      |
| $5_{42} \leftarrow 4_{32}$ | I       | 10314.4195  | 0.0079      |
|                            | II      | 10616.9940  | 0.0024      |
| $6_{43} \leftarrow 5_{33}$ | I       | 11864.8182  | 0.0115      |
|                            | II      | 11979.5889  | 0.0035      |
| $6_{51} \leftarrow 5_{41}$ | I       | 12575.2411  | 0.009       |
|                            | II      | 13062.1782  | 0.0028      |

**Table S7.** SAPT analysis (all values in kJ mol<sup>-1</sup>).

|                             | Electrostatic                       | Induction            | Dispersion             | Exchange | Total |
|-----------------------------|-------------------------------------|----------------------|------------------------|----------|-------|
| ISO-MA- I                   | -19.4 ( <b>33.2%</b> ) <sup>a</sup> | -5.2 ( <b>8.8%</b> ) | -33.9 ( <b>58.0%</b> ) | 35.1     | -23.4 |
| ISO-MA- II                  | -19.4 ( <b>34.0%</b> )              | -4.9 ( <b>8.6%</b> ) | -32.7 ( <b>57.4%</b> ) | 34.6     | -22.4 |
| (Dibenzofuran) <sub>2</sub> | -29.5( <b>25.2%</b> )               | -6.7( <b>5.7%</b> )  | -80.9( <b>69.1%</b> )  | 65.6     | -51.5 |
| (Benzene) <sub>2</sub>      | -9.2( <b>20.8%</b> )                | -2.6( <b>5.8%</b> )  | -32.47( <b>73.4%</b> ) | 33.5     | -27.7 |

<sup>a</sup> Percentage contribution to total attracting energy.

**Table S8.** Stabilization energy contributions ( $E^{(2)} \geq 0.40$  kJ mol<sup>-1</sup>) for isomers I and II of ISO-MA.

| Isomer I         |                  |                                   |
|------------------|------------------|-----------------------------------|
| Donor NBO        | Acceptor NBO     | $E^{(2)}$ [kJ mol <sup>-1</sup> ] |
| from ISO to MA   |                  |                                   |
| BD (2) C1 - C2   | RY*(3) C16       | 0.75                              |
| BD (2) C1 - C2   | BD*(2) C14 - O15 | 1.59                              |
| BD (2) C1 - C2   | BD*(2) C16 - C17 | 3.09                              |
| BD (2) C5 - C6   | BD*(2) C16 - C17 | 1.17                              |
| BD (2) C5 - C6   | BD*(2) C19 - O20 | 1.80                              |
| from MA to ISO   |                  |                                   |
| BD (2) C16 - C17 | BD*(2) C5 - C6   | 1.46                              |
| BD (2) C19 - O20 | BD*(2) C5 - C6   | 0.71                              |
| LP (2) O21       | BD*(1) C10 - H13 | 0.46                              |
| Isomer II        |                  |                                   |
| Donor NBO        | Acceptor NBO     | $E^{(2)}$ [kJ mol <sup>-1</sup> ] |
| from ISO to MA   |                  |                                   |
| BD (2) C1 - C2   | RY*(3) C16       | 0.67                              |
| BD (2) C1 - C2   | BD*(2) C16 - C17 | 3.47                              |
| BD (1) C5 - C6   | RY*(8) C19       | 0.50                              |
| BD (2) C5 - C6   | BD*(2) C14 - O15 | 0.54                              |
| BD (2) C5 - C6   | BD*(2) C16 - C17 | 0.54                              |
| BD (2) C5 - C6   | BD*(2) C19 - O20 | 2.38                              |
| from MA to ISO   |                  |                                   |
| BD (2) C16 - C17 | BD*(2) C1 - C2   | 0.92                              |
| BD (2) C19 - O20 | BD*(2) C5 - C6   | 0.54                              |

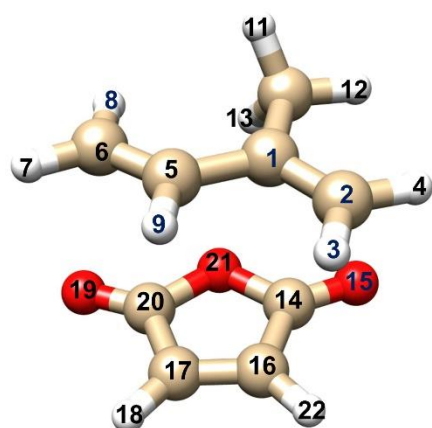

Isomer I

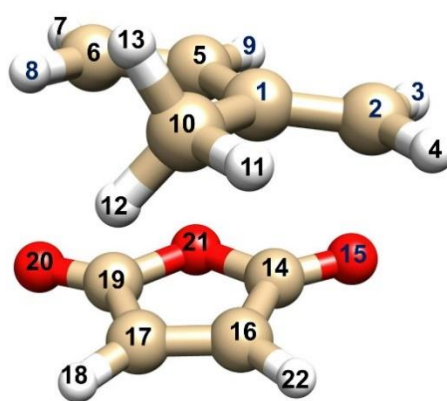

Isomer II
